# Supplementary material for: Transcriptomic Analysis Revealed Candidate Genes Involved in Pseudomale Sperm Abnormalities in Chinese Tongue Sole (Cynoglossus semilaevis)
Source: MDPI journal article supplement (doi:10.3390/biology11121716), 2022-11-26
Supplement: s1 [file s1]

**Supplementary Table S2 Summary of sperm transcriptomes**

| <b>Sample</b> | <b>Raw Reads</b> | <b>Raw Bases</b> | <b>Clean Reads</b> | <b>Clean Bases</b> | <b>Valid Bases</b> | <b>Q30</b> |
|---------------|------------------|------------------|--------------------|--------------------|--------------------|------------|
| M1            | 45.97M           | 6.90G            | 45.20M             | 6.68G              | 96.95%             | 94.62%     |
| M2            | 44.80M           | 6.72G            | 44.02M             | 6.52G              | 96.99%             | 94.50%     |
| M3            | 43.63M           | 6.54G            | 42.87M             | 6.34G              | 96.83%             | 92.42%     |
| M4            | 46.39M           | 6.96G            | 45.64M             | 6.76G              | 97.09%             | 94.71%     |
| PM1           | 44.62M           | 6.69G            | 43.77M             | 6.46G              | 96.58%             | 94.02%     |
| PM2           | 45.88M           | 6.88G            | 45.02M             | 6.65G              | 96.60%             | 94.22%     |
| PM3           | 45.82M           | 6.87G            | 45.04M             | 6.65G              | 96.75%             | 94.07%     |
| PM4           | 42.83M           | 6.43G            | 41.92M             | 6.19G              | 96.32%             | 93.80%     |
