# Supplementary material for: Transcriptomic Analysis Revealed Candidate Genes Involved in Pseudomale Sperm Abnormalities in Chinese Tongue Sole (Cynoglossus semilaevis)
Source: MDPI journal article supplement (doi:10.3390/biology11121716), 2022-11-26
Supplement: s1 [file s1]

**Supplementary Table S4 The information of eight genes enriched in 14-15M region of Z chromosomes**

| <b>Gene ID</b> | <b>Annotation</b>                                                         |
|----------------|---------------------------------------------------------------------------|
| LOC107990240   | general transcription factor II-I repeat domain-containing protein 2-like |
| LOC103398026   | SH2 domain-containing protein 3C                                          |
| LOC103398119   | Uncharacterized protein                                                   |
| LOC103398061   | poly [ADP-ribose] polymerase 14-like                                      |
| LOC103398033   | G protein-coupled receptor kinase 5-like                                  |
| LOC103398104   | prkab1b, protein kinase, AMP-activated, beta 1 non-catalytic subunit, b   |
| LOC103398005   | poly [ADP-ribose] polymerase 14-like                                      |
| LOC103398120   | HPS4 biogenesis of lysosomal organelles complex 3 subunit 2               |
