# Supplementary material for: Transcriptomic Analysis Revealed Candidate Genes Involved in Pseudomale Sperm Abnormalities in Chinese Tongue Sole (Cynoglossus semilaevis)
Source: MDPI journal article supplement (doi:10.3390/biology11121716), 2022-11-26
Supplement: s1 [file s1]

**Supplementary Table S1 Primers used in this study.**

| <b>Gene ID</b> | <b>Primer</b>     | <b>Sequence (5'-3')</b> |
|----------------|-------------------|-------------------------|
| 103394973      | Uncharacterized F | GTTTCTCTGAGGCAGCGAC     |
|                | Uncharacterized R | CGCTGCCATCCATCGCTTTA    |
| 112488693      | brinp2 F          | ACCTCCCTCCAGAAACGCTA    |
|                | brinp2 R          | AACCAAAACCCAACAGACCT    |
| 103397964      | nacc2 F           | CGCTGCCATCCATCGCTTTA    |
|                | nacc2 R           | TCGGTTGTCCAGGGGCTTTC    |
| 103397915      | fmo5 F            | TGCCACTCAGCGACTTCA      |
|                | fmo5 R            | TTGTCCAATACGGCTCACC     |
| 103396267      | lrrc7 F           | GACACGCAGACGCTTCCCTT    |
|                | lrrc7 R           | CGCCTTGAGTCCATTTTCCTT   |
| 103397837      | rtn4r F           | GTCCAACCACGGGCTTTCA     |
|                | rtn4r R           | TTTCGCTCGGCAGTCACA      |
| 103392878      | syt3 F            | GAGGCAACAGCCAGAGCAA     |
|                | syt3 R            | CGATGACTGACAGCAAATAACA  |
| 103380652      | foxo1a F          | GTCGTCCCCGTCTCCTATGAT   |
|                | foxo1a R          | AAAACTGGGCTTGCTCTCTGG   |
| 103379355      | foxo3a F          | GAGGACGAGCCACCAAGAAAA   |
|                | foxo3a R          | GCTGAGGGTGCTGGCATTAGA   |
| 103380652      | foxo3b F          | TTGCTTGTC AACATCAACCTG  |
|                | foxo3b R          | TGAAGAGAAACCGTCGTGTG    |
| 103390850      | foxo4 F           | AGACGGTGCCTTACTTCAGAG   |
|                | foxo4 R           | GGTGCTTTCCCAGTTTTGC     |
| 103387887      | foxo6-like F      | CAGTTATCATCCGCACCGTC    |
|                | foxo6-like R      | GCCTTGTTCTCTTGAATCGTCT  |
| 103393304      | actinF            | TTCCAGCCTTCCTTCCTT      |
|                | actinR            | TACCTCCAGACAGCACAG      |
